# Supplementary material for: Atypical antipsychotics in bipolar disorder: systematic review of randomised trials
Source: BMC Psychiatry. 2007 Aug 16;7:40. doi: 10.1186/1471-244X-7-40 (PMC2020469; doi:10.1186/1471-244X-7-40)
Supplement: Additional file 2 — Trials of atypical antipsychotics in mania/mixed states – design, details, and outcomes. A listing of the trials, with their main design features, efficacy outcomes, discontinuations, and adverse event reporting. [file 1471-244X-7-40-S2.pdf]

Additional file 2: Trials of atypical antipsychotics in mania/mixed states - design, details, and outcomes

| Reference<br>[number]                                                | Patients                                                                                                                                               | Treatment                                                                                                    | Median/modal dose                                                                      | Concomitant<br>medication                                                                    | Duration<br>(weeks) | QS         | Response                                                                                                                                                                   | Remission                                                                                 | CGI                                                                                                              | Depression score                                                                                                    | Symptomatic<br>depression or affective<br>episode                   |
|----------------------------------------------------------------------|--------------------------------------------------------------------------------------------------------------------------------------------------------|--------------------------------------------------------------------------------------------------------------|----------------------------------------------------------------------------------------|----------------------------------------------------------------------------------------------|---------------------|------------|----------------------------------------------------------------------------------------------------------------------------------------------------------------------------|-------------------------------------------------------------------------------------------|------------------------------------------------------------------------------------------------------------------|---------------------------------------------------------------------------------------------------------------------|---------------------------------------------------------------------|
| <b>Less than 6 weeks</b>                                             |                                                                                                                                                        |                                                                                                              |                                                                                        |                                                                                              |                     |            |                                                                                                                                                                            |                                                                                           |                                                                                                                  |                                                                                                                     |                                                                     |
| Segal et al.<br>1998<br>[23]                                         | Bipolar disorder, manic<br>Age: 34 years<br>M: 22%                                                                                                     | (1) risperidone 6 mg/day, n=15<br>(2) haloperidol 10 mg/day, n=15<br>(3) lithium to give 0.6-1.2mmol/L, n=15 | no data                                                                                | Benzodiazepines<br>Anticholinergics for EP symptoms                                          | 4                   | R1, D1, W0 | mean data only                                                                                                                                                             | no data                                                                                   | mean changes small and did not differ between groups                                                             | no data                                                                                                             | no data                                                             |
| Tohen et al.<br>1999<br>[24]                                         | Bipolar disorder, manic or mixed<br>Age: 40±11 years<br>M: 52%<br>manic: 83%<br>mixed: 17%                                                             | (1) olanzapine 5-20 mg/day, n=70<br>(2) placebo, n=69                                                        | 15 mg/day                                                                              | Benzodiazepines (86%)<br>Anticholinergics for EP symptoms (9.4%)<br>No sig differences       | 3                   | R1, D1, W1 | ≥50% dec in YMRS at endpoint<br>(1) 34/70<br>(2) 16/69                                                                                                                     | no data                                                                                   | mean changes in CGI- BP scales given, no categorical data<br>Overall: no sig diff between olanzapine and placebo | no data                                                                                                             | no data                                                             |
| Berk et al.<br>1999<br>[25]                                          | Bipolar disorder, manic<br>Age: 31 years<br>M: 57%                                                                                                     | (1) olanzapine 10 mg/day, n=15<br>(2) lithium 800 mg/day                                                     | no data                                                                                | Benzodiazepines<br>Anticholinergics for EP symptoms                                          | 4                   | R1 D1 R1   | mean data only                                                                                                                                                             | no data                                                                                   | mean changes in CGI- BP scales given, no categorical data<br>Overall: olanzapine sig better than lithium         | no data                                                                                                             | no data                                                             |
| Tohen et al.<br>2000<br>[26]                                         | Bipolar disorder, manic or mixed<br>Age: 39 years<br>M: 50%<br>manic: 58%<br>mixed: 42%                                                                | (1) olanzapine 5-20 mg/day, n=55<br>(2) placebo, n=60                                                        | 20 mg/day                                                                              | Benzodiazepines (70%)<br>Anticholinergics for EP symptoms (negligible)<br>No sig differences | 4                   | R1, D1, W1 | ≥50% dec in YMRS at endpoint<br>(1) 35/55<br>(2) 25/60                                                                                                                     | Euthymic: YMRS ≤12<br>(1) 33/55<br>(2) 20/60                                              | mean changes in CGI- BP scales given, no categorical data<br>Overall: olanzapine better than placebo             | Mean values improved in both groups. Greater improvement seen for olanzapine in subset with HAMD-21 ≥20 at baseline | ≥3 point worsening in HAMD-21<br>(1) 6/55<br>(2) 10/60              |
| Tohen et al.<br>2002<br>See Tohen<br>2003b for 47 week study<br>[27] | Bipolar disorder, manic or mixed<br>Age: 40±12 years<br>M: 42%<br>manic: 57%<br>mixed: 43%<br>Excl: history of intolerance to olanzapine or divalproex | (1) olanzapine 5-20 mg/day, n=125<br>(2) divalproex 500-2500 mg/day, n=126                                   | [mean modal]<br>(1) 17 mg/day<br>(2) 1401 mg/day                                       | Benzodiazepines (65%)<br>Anticholinergics for EP symptoms (13%, 10%)<br>No sig differences   | 3                   | R1, D2, W1 | ≥50% dec in YMRS at endpoint<br>(1) 59/125<br>(2) 42/126<br>Time to response sig shorter in olanzapine group<br>Greater mean change for nonpsychotic vs psychotic patients | YMRS ≤12<br>(1) 48/127<br>(2) 24/119<br>Time to remission sig shorter in olanzapine group | no data                                                                                                          | Mean values improved in both groups. Greater improvements seen in subset with HAMD-21 ≥20 at baseline               | no data                                                             |
| Hirschfeld et al.<br>2004<br>[28]                                    | Bipolar I disorder, manic<br>Age: 39±12 years<br>M: 57%<br>Excl: history of poor response to monotherapy with antimanic or antipsychotic drug          | (1) risperidone 1-6 mg/day, n=134<br>(2) placebo, n=125                                                      | [mean modal]<br>4 mg/day<br>More placebo pts took max dose, and dose escalation faster | Benzodiazepines (81%, 82%)<br>Anticholinergics for EP symptoms (22%, 11%)                    | 3                   | R2, D1, W1 | ≥50% dec in YMRS at any time<br>(1) 48/127<br>(2) 29/119<br>Greater mean change for nonpsychotic vs psychotic patients                                                     | YMRS ≤12<br>(1) 48/127<br>(2) 24/119                                                      | not ill/mildly ill at endpoint:<br>(1) 68/127<br>(2) 31/119                                                      | Mean values improved in both groups                                                                                 | no data                                                             |
| Yatham et al.<br>2003<br>[29]                                        | Bipolar disorder, manic or mixed<br>Age: 40(19-65) years<br>M: 42%<br>manic: 92%<br>mixed: 8%                                                          | (1) risperidone 1-6 mg/day plus mood stabiliser, n=75<br>(2) placebo plus mood stabiliser, n=75 [ITT]        | 4 mg/day                                                                               | Benzodiazepines (72%, 63%)<br>Anticholinergics for EP symptoms (16%, 8%)                     | 3                   | R2, D1, W1 | ≥50% dec in YMRS<br>(1) 40/75<br>(2) 30/75                                                                                                                                 | no data                                                                                   | much/v much improved at endpoint:<br>(1) 40/75<br>(2) 31/75                                                      | Mean values decreased in both groups                                                                                | depressive symptoms - given antidepressants<br>(1) 1/75<br>(2) 2/75 |

|                         |                                                                                                                                                                                                |                                                                                                                                                                 |                                                                                                            |                                                                                                                               |   |            |                                                           |                                     |                                                                                                       |                                                                        |                                                                                                     |
|-------------------------|------------------------------------------------------------------------------------------------------------------------------------------------------------------------------------------------|-----------------------------------------------------------------------------------------------------------------------------------------------------------------|------------------------------------------------------------------------------------------------------------|-------------------------------------------------------------------------------------------------------------------------------|---|------------|-----------------------------------------------------------|-------------------------------------|-------------------------------------------------------------------------------------------------------|------------------------------------------------------------------------|-----------------------------------------------------------------------------------------------------|
| Sachs et al. 2002 [30]  | Bipolar disorder, manic or mixed<br>Age:43(18-66) years<br>M: 51%<br>manic:79%<br>mixed:21%<br>Excl: sensitivity to any trial drug, lab value outside normal range                             | (1) risperidone 1-6 mg/day plus mood stabiliser, n=52<br>(2) haloperidol 2-12 mg/day plus mood stabiliser, n=53<br>(3) placebo plus mood stabiliser, n=51 [ITT] | [mean modal]<br>(1) 4 mg/day<br>(2) 6 mg/day                                                               | Benzodiazepines (67%, 64%, 59%)<br>Anticholinergics for EP symptoms (17%, 20%, 8%)<br>sig diff tween (2) and (3) for antichol | 3 | R1, D1, W1 | mean data only                                            | no data                             | much/v much improved at endpoint:<br>(1) 27/51<br>(2) 25/50<br>(3) 14/47                              | no data                                                                | no data                                                                                             |
| Sachs et al. 2004 [31]  | Bipolar disorder, manic<br>Age:41 years<br>M: 56%<br>Excl: intolerance or lack of response to quetiapine or clozapine, rapid cycling                                                           | (1) quetiapine 200-800 mg/day plus mood stabiliser, n=90<br>(2) placebo plus mood stabiliser, n=100 [ITT]                                                       | [mean last week dose]<br>504 mg/day<br>No difference in use of mood stabilisers                            | Benzodiazepine and other sleep medication use limited and not sig diff in serum levels bet groups<br>No anticholinergics      | 3 | R1, D2, W1 | ≥50% dec in YMRS at endpoint<br>(1) 44/81<br>(2) 29/89    | YMRS≤12<br>(1) 37/81<br>(2) 23/89   | much/v much improved<br>(1) 41/81<br>(2) 28/89                                                        | Total scores decreased in both groups                                  | MADRS ≥18 with inc ≥4 from baseline on two consec assess or at endpoint<br>(1) 14/90<br>(2) 12/100  |
| Yatham et al. 2004 [32] | Bipolar I disorder, manic<br>Age:40(18-70) years<br>M: 53%<br>Excl: intolerance or lack of response to quetiapine, lithium, divalproex or clozapine                                            | (1) quetiapine 200-800 mg/day plus mood stabiliser, n=185<br>(2) placebo plus mood stabiliser, n=185 [ITT]                                                      | [mean last week dose in responders]<br>(1) 492 mg/day<br>No difference in serum levels of mood stabilisers | Benzodiazepines, no anticholinergics                                                                                          | 3 | R1, D1, W1 | ≥50% dec in YMRS at endpoint<br>(1) 103/185<br>(2) 77/185 | YMRS≤12<br>(1) 90/185<br>(2) 61/185 | much/v much improved<br>(1) 108/185<br>(2) 80/185                                                     | Mean baseline values low, similar reduction for both groups            | MADRS ≥18 with inc ≥4 from baseline on two consec assess or at endpoint<br>(1) 19/185<br>(2) 18/185 |
| Keck et al. 2003 [33]   | Bipolar I disorder, manic or mixed<br>Age:38(19-64) years<br>M: 54%<br>manic:65%<br>mixed:35%<br>Excl: history of hypersensitivity to antipsychotic drugs, previous treatment with ziprasidone | (1) ziprasidone 40-80 mg/day, n=131<br>(2) placebo, n=66 [ITT]                                                                                                  | [mean last week dose]<br>130 mg/day                                                                        | Benzodiazepines, no sig diff bet groups<br>Anticholinergics for EP symptoms                                                   | 3 | R2, D2, W1 | ≥50% dec in YMRS at endpoint<br>(1) 66/131<br>(2) 23/66   | no data                             | mean changes in CGI-BP scales given, no categorical data<br>Overall: ziprasidone better than placebo  | Sig greater red in mean score for ziprasidone than placebo             | no data                                                                                             |
| Keck et al. 2003b [34]  | Bipolar I disorder, manic or mixed<br>Age:40±12 years<br>M: 44%<br>manic: 67%<br>mixed: 33%<br>Excl: non response to clozapine, anticipated requirement for prohibited drugs                   | (1) aripiprazole 30 mg/day, n=127<br>(2) placebo, n=127 [ITT]                                                                                                   | [mean dose at endpoint]<br>28 mg/day                                                                       | Benzodiazepines (86%, 85%)<br>Anticholinergics for EP symptoms                                                                | 3 | R1, D1, W1 | ≥50% dec in YMRS at endpoint<br>(1) 51/127<br>(2) 24/127  | no data                             | mean changes in CGI-BP scales given, no categorical data<br>Overall: aripiprazole better than placebo | no data                                                                | no data                                                                                             |
| Potkin et al. 2005 [35] | Bipolar I disorder, manic or mixed<br>Age: 39±12 years<br>M: 51%<br>manic: 60%<br>mixed: 40%                                                                                                   | (1) ziprasidone 80-160 mg/day, n=139<br>(2) placebo, n=66 [ITT]                                                                                                 | [mean]<br>(1) 112 mg/day<br>(2) "slightly higher"                                                          | Benzodiazepines (73%, 62%)<br>Anticholinergics for EP symptoms (25%, 6%)                                                      | 3 | R2, D2, W1 | ≥50% dec in MRS (SADS-CB)<br>(1) 64/139<br>(2) 19/66      | no data                             | mean changes in CGI-BP scales given, no categorical data<br>Overall: ziprasidone better than placebo  | Mean improvement greater for ziprasidone throughout study, but not sig | no data                                                                                             |

|                                                                                         |                                                                                                                                                                                                                                                             |                                                                                                            |                                                                      |                                                                             |    |            |                                                                                                                                                                                                                               |                                                                                             |                                                                                                                                                                       |                                                                                                                                                                              |                                                                   |
|-----------------------------------------------------------------------------------------|-------------------------------------------------------------------------------------------------------------------------------------------------------------------------------------------------------------------------------------------------------------|------------------------------------------------------------------------------------------------------------|----------------------------------------------------------------------|-----------------------------------------------------------------------------|----|------------|-------------------------------------------------------------------------------------------------------------------------------------------------------------------------------------------------------------------------------|---------------------------------------------------------------------------------------------|-----------------------------------------------------------------------------------------------------------------------------------------------------------------------|------------------------------------------------------------------------------------------------------------------------------------------------------------------------------|-------------------------------------------------------------------|
| Khanna et al.<br>2005<br>[36]                                                           | Bipolar I disorder, manic or mixed<br>Age: 35 years<br>M: 62%<br>manic: 96%<br>mixed: 4%<br>Excl: rapid cycling, antidepressant-induced mania                                                                                                               | (1) risperidone 1-6 mg/day, n=146<br>(2) placebo, n=144                                                    | no data                                                              | Benzodiazepines (99%)<br><br>Antiparkinsonian med for EP symptoms (36%, 6%) | 3  | R1, D1, W1 | ≥50% dec in YMRS at endpoint<br>(1) 107/146<br>(2) 52/144<br><br>No sig diff between psychotic/non-psychotic and manic/mixed subgroups                                                                                        | no data                                                                                     | not ill/mildly ill at endpoint:<br>(1) 104/146<br>(2) 356/144                                                                                                         | Mean baseline scores low, but improvement sig better in risperidone group than placebo                                                                                       | no data                                                           |
| Smulevich et al.<br>2005<br>[37]                                                        | Bipolar I disorder, manic or mixed<br>Age: 40 years<br>M: 52%<br>manic/mixed: not given<br>Excl: history poor response to antipsychotic monotherapy, rapid cycling                                                                                          | (1) risperidone 1-6 mg/day, n=154<br>(2) haloperidol 2-12 mg/day, n=144<br>(3) placebo, n=140              | (1) 4 mg/day<br>(2) 8 mg/day                                         | Benzodiazepines (50%)<br>Antiparkinsonian med for EPS                       | 3  | R1, D1, W1 | ≥50% dec in YMRS at 21 days<br>(1) 74/154<br>(2) 68/144<br>(3) 46/140<br><br>No sig diff in change for nonpsychotic vs psychotic patients taking risperidone                                                                  | no data                                                                                     | mean changes in CGI-BP scales given, no categorical data<br>Overall: risperidone and haloperidol better than placebo, no sig diff between risperidone and haloperidol | Mean improvement in all groups: sig more in active groups than placebo                                                                                                       | no data                                                           |
| Sachs et al.<br>2006<br>[38]                                                            | Bipolar I disorder, manic or mixed relapse, requiring hospitalisation, with YMRS≥20 at randomisation<br>Age: 39 years<br>M: 49%<br>manic: 58%<br>mixed: 42%<br>rapid cycling: 18%<br>Excl: history of no response to clozapine, previous aripiprazole trial | (1) aripiprazole 15-30 mg/day, n=136<br>(2) placebo, n=133                                                 | (1) 27.7 mg/day                                                      | Lorazepam                                                                   | 3  | R1, D1, W1 | ≥50% dec in YMRS at 21 days<br>(1) 72/136<br>(2) 42/132<br><br>Sig diff between groups by 7 days, and inc to 21 days<br><br>Subgroups with rapid cycling and mixed episodes showed sig benefits for aripiprazole over placebo | no data                                                                                     | mean changes in CGI-BP scales sig greater for aripiprazole by day 7, no categorical data                                                                              | Baseline scores low, non-sig improvement                                                                                                                                     | no data                                                           |
| <b>Six to 12 weeks</b>                                                                  |                                                                                                                                                                                                                                                             |                                                                                                            |                                                                      |                                                                             |    |            |                                                                                                                                                                                                                               |                                                                                             |                                                                                                                                                                       |                                                                                                                                                                              |                                                                   |
| Tohen et al.<br>2002b<br>[39]                                                           | Bipolar disorder, manic or mixed, with inadequate response to monotherapy<br>Age: 41±11 years<br>M: 48%<br>manic: 52%<br>mixed: 48%                                                                                                                         | (1) olanzapine 5-20 mg/day plus mood stabiliser, n=229<br>(2) placebo plus mood stabiliser, n=115          | 10 mg/day                                                            | Benzodiazepines (29%, 34%)<br>Antiparkinsonian med for EPS                  | 6  | R1, D1, W1 | ≥50% dec in YMRS<br>(1) 149/220<br>(2) 51/114<br>Median time to response (days)<br>(1) 18<br>(2) 28<br>Cotherapy better than mono for non-psychotic patients                                                                  | YMRS≤12<br>(1) 173/220<br>(2) 75/114<br>Median time to remission (days)<br>(1) 14<br>(2) 22 | mean changes in CGI-BP scales given, no categorical data                                                                                                              | sig improvement in mean HAMD-21 for olanzapine group<br><br>For subset with mixed episode and HAMD-21 ≥20 at baseline (n=21), sig greater reduction in group with olanzapine | As AE<br>(1) 41/225<br>(2) 20/115                                 |
| Zajacka et al.<br>2002<br>Efficacy to 3 weeks, Safety to 12 weeks in responders<br>[40] | Bipolar I disorder, manic or mixed<br>Age: 38±12 years<br>M: 54%<br>manic: 52%<br>mixed: 48%<br>Excl: previous non-responders to olanzapine or divalproex                                                                                                   | (1) olanzapine 5-20 mg/day, n=57<br>(2) divalproex 20 mg/kg/day+1000mg, n=63<br>First 3 weeks as inpatient | [mean maximum]<br>(1) 15 (5-25) mg/day<br>(2) 2115 (750-3250) mg/day | No sig diff between groups for rescue meds                                  | 12 | R1, D2, W1 | Change in MRS from baseline, at 3 weeks: both groups had decrease of about 50% with no sig diff between groups. Improvements maintained to 12 weeks, with no diff between groups                                              | no data                                                                                     | Mean improvement in both groups: no sig diff, maintained to 12 weeks                                                                                                  | Mean improvement in both groups: no sig diff, maintained to 12 weeks                                                                                                         | incomplete data, but one case of serious depression in each group |

|                           |                                                                                                                                                                                                                      |                                                                                                      |                                                                                                                                                                |                                                                                      |    |            |                                                                                                                                                                                                           |                                                                                                                                                                                          |                                                                                                                                 |                                                                                                                                                                         |                                                                                                                                                                       |
|---------------------------|----------------------------------------------------------------------------------------------------------------------------------------------------------------------------------------------------------------------|------------------------------------------------------------------------------------------------------|----------------------------------------------------------------------------------------------------------------------------------------------------------------|--------------------------------------------------------------------------------------|----|------------|-----------------------------------------------------------------------------------------------------------------------------------------------------------------------------------------------------------|------------------------------------------------------------------------------------------------------------------------------------------------------------------------------------------|---------------------------------------------------------------------------------------------------------------------------------|-------------------------------------------------------------------------------------------------------------------------------------------------------------------------|-----------------------------------------------------------------------------------------------------------------------------------------------------------------------|
| Tohen et al. 2003 [41]    | Bipolar I disorder, manic or mixed<br>Age:40±13(18-86) years<br>M: 40%<br>manic:94%<br>mixed:6%                                                                                                                      | (1) olanzapine 5-20 mg/day, n=234<br>(2) haloperidol 3-15 mg/day, n=219                              | [median at week 6]<br>(1) 15 mg/day<br>(2) 5 mg/day<br>[median at week 12]<br>(1) 10 mg/day<br>(2) 3 mg/day                                                    | Benzodiazepines (60%, 65%)<br>Anticholinergics for EP symptoms (18%, 60%)            | 12 | R2, D1, W1 | ≥50% dec in YMRS at 6 weeks<br>(1) 169/234<br>(2) 162/219<br>(1) 154/160<br>(2) 130/138                                                                                                                   | YMRS≤12 and HAM-D ≤8 at 6weeks<br>(1) 112/234<br>(2) 101/219<br>Median time to remission (days)<br>(1) 34<br>(2) 29<br>Olanzapine sig better than haloperidol for non-psychotic patients | no data                                                                                                                         | Mean baseline values low. Small mean changes not likely to be clinically relevant<br>For subgroups with mixed episode or HAM-D-21 ≥20 at baseline, greater changes seen | affective episode (YMRS ≥15 and HAM-D ≥15 foll remission)<br>(1) 16/122<br>(2) 15/101<br>Switch to depression (HAM-D ≥15 foll ≤8 at entry<br>(1) 12/128<br>(2) 22/131 |
| Bowden et al. 2005 [42]   | Bipolar I disorder, manic<br>Age:39(18-73) years<br>M: 57%<br>Excl: intolerance to quetiapine or lithium, or lack of response to clozapine, quetiapine or lithium. Clinically sig abbnormalities in ECG or labvalues | (1) quetiapine 100-800 mg/day, n=107<br>(2) placebo, n=95<br>(3) lithium to give 0.6-1.4 mEq/L, n=98 | (1) [mean last week dose in responders]<br>3 weeks: 586 mg/day<br>12 weeks: 618 mg/day<br>(2) [median serum conc]<br>3 weeks: 0.8 mEq/L<br>12 weeks: 0.8 mEq/L | Benzodiazepines (36%, 31%, 46%)<br>Anticholinergics for EP symptoms (11%, 12%, 8%)   | 12 | R1, D2, W1 | ≥50% dec in YMRS at 21 days<br>(1) 57/107<br>(2) 26/95<br>(3) 52/98<br>at 84 days<br>(1) 77/107<br>(2) 39/95<br>(3) 74/98                                                                                 | YMRS≤12 at 21 days<br>(1) 50/107<br>(2) 21/95<br>(3) 48/98<br>at 84 days<br>(1) 74/107<br>(2) 32/95<br>(3) 71/98                                                                         | much/v much improved at 21 days<br>(1) 68/107<br>(2) 29/95<br>(3) 63/98<br>at 84 days<br>(1) 77/107<br>(2) 35/95<br>(3) 71/98   | Mean baseline values low. At 3 weeks quetiapine sig better than placebo, at 84 days, both quetiapine and lithium better than placebo                                    | MADRS ≥18 with inc ≥4 from baseline on two consec assess or at endpoint<br>(1) 6/107<br>(2) 8/97<br>(3) 3/99<br><br>As AE:<br>(1) 6/107<br>(2) 1/97<br>(3) 1/98       |
| McIntyre et al. 2005 [43] | Bipolar I disorder, manic<br>Age:43(18-79) years<br>M: 37%<br>Excl: rapid cycling, mixed episode, intolerance or lack of response to quetiapine or clozapine                                                         | (1) quetiapine 100-800 mg/day, n=102<br>(2) placebo, n=101<br>(3) haloperidol 2-8 mg/day, n=99       | no data                                                                                                                                                        | Benzodiazepines (48%, 54%, 46%)<br>Anticholinergics for EP symptoms (10%, 53%, 12%)  | 12 | R1, D2, W1 | ≥50% dec in YMRS at 21 days<br>(1) 43/101<br>(2) 35/100<br>(3) 55/98<br>at 84 days<br>(1) 62/101<br>(2) 39/100<br>(3) 69/98<br>Greater mean change for nonpsychotic vs psychotic patients                 | YMRS≤12 at 21 days<br>(1) 28/101<br>(2) 24/100<br>(3) 36/98<br>at 84 days<br>(1) 62/101<br>(2) 38/100<br>(3) 62/98                                                                       | much/v much improved at 21 days<br>(1) 44/101<br>(2) 35/100<br>(3) 52/98<br>at 84 days<br>(1) 51/101<br>(2) 30/100<br>(3) 59/98 | Mean baseline values low. At 3 weeks quetiapine and haloperidol sig better than placebo, at 84 days, only quetiapine better than placebo                                | MADRS ≥18 with inc ≥4 from baseline on two consec assess or at endpoint<br>(1) 3/102<br>(2) 9/101<br>(3) 8/99<br><br>As AE:<br>(1) 2/102<br>(2) 4/101<br>(3) 1/99     |
| Vieta et al. 2005 [44]    | Bipolar I disorder, manic or mixed<br>Age:42 (0.6) years<br>M: 38%<br>manic:89%<br>mixed:11%<br>Excl: rapid cycling, considered unresponsive to antipsychotics                                                       | (1) aripiprazole 15-30 mg/day, n=174<br>(2) haloperidol 10-15 mg/day, n=170 [ITT]                    | no data                                                                                                                                                        | Benzodiazepines<br>No anticholinergics for sympt or prophylact treatment of EP sympt | 12 | R1, D1, W1 | ≥50% dec in YMRS at 3 weeks<br>(1) 88/174<br>(2) 72/170<br>at 12 weeks<br>(1) 86/174<br>(2) 48/170<br>≥50% dec in MADRS at 3 weeks<br>(1) 80/174<br>(2) 63/170<br>at 12 weeks<br>(1) 80/174<br>(2) 56/170 | YMRS<12 at 3 weeks<br>(1) 61/174<br>(2) 53/170<br>at 12 weeks<br>(1) 87/174<br>(2) 46/170                                                                                                | mean changes in CGI-BP scales given, no categorical data                                                                        | ≥50% dec in MADRS at 3 weeks<br>(1) 89/174<br>(2) 63/170<br>at 12 weeks<br>(1) 89/174<br>(2) 56/170                                                                     | CGI-BP depression scale dec ≥2 points<br>(1) 19/173<br>(2) 29/164<br><br>AsAE:<br>(1) 20/175<br>(2) 24/169<br><br>Sig diff in mean scores up to week 6, then ns diff  |

# Longer than 12 weeks

|                                                                    |                                                                                                                                                                                                                                                                         |                                                                                                                                                                     |                                                                    |                                                                                           |    |            |                                                                                                                                                                                 |                                                                                                                                                               |                            |         |                                                                                                                                                                                                                                                                                                       |
|--------------------------------------------------------------------|-------------------------------------------------------------------------------------------------------------------------------------------------------------------------------------------------------------------------------------------------------------------------|---------------------------------------------------------------------------------------------------------------------------------------------------------------------|--------------------------------------------------------------------|-------------------------------------------------------------------------------------------|----|------------|---------------------------------------------------------------------------------------------------------------------------------------------------------------------------------|---------------------------------------------------------------------------------------------------------------------------------------------------------------|----------------------------|---------|-------------------------------------------------------------------------------------------------------------------------------------------------------------------------------------------------------------------------------------------------------------------------------------------------------|
| Tohen et al. 2003b<br>See Tohen 2002, for analysis to 3 weeks [45] | Bipolar disorder, manic or mixed<br>Age: 40±12 years<br>M: 42%<br>manic: 57%<br>mixed: 43%<br>Excl: history of intolerance to olanzapine or divalproex                                                                                                                  | (1) olanzapine 5-20 mg/day, n=125<br>(2) divalproex 500-2500 mg/day, n=126                                                                                          | (1) 16 mg/day<br>(2) 2585 mg/day                                   | Benzodiazepine use limited<br>Anticholinergics to treat EP symptoms                       | 47 | R1, D2, W1 | Mean YMRS scores sig better for olanzapine than divalproex from wk 2 to 15, then no sig diff wk 30 to 47<br><br>Mean HAM-D scores non sig better for olanzapine than divalproex | YMRS≤12<br>(1) 71/125<br>(2) 57/126<br>Median time to remission (days)<br>(1) 14<br>(2) 62<br><br>YMRS≤12 and MADRS≤8 at endpoint<br>(1) 39/125<br>(2) 39/126 | no sig diff between groups | no data | symp relapse into affective episode (YMRS≥15 or HAM-D ≥15 foll remission)<br>(1) 14/33<br>(2) 13/23<br><br>As AE:<br>(1) 43/125<br>(2) 38/126                                                                                                                                                         |
| Tohen et al. 2004<br>See Tohen 2002b for parent study [46]         | Bipolar I disorder with remission of manic episode after treatment with olanzapine plus lithium or valproate<br>Age: 41 (19-69) years<br>M: 48%<br>manic: 50%<br>mixed: 50%<br>Excl: history of intolerance to olanzapine                                               | additional<br>(1) olanzapine 5-20 mg/day plus lithium or valproate, n=51<br>(2) placebo plus lithium or valproate, n=48                                             | 9 mg/day<br>lithium or valproate doses very similar between groups | Benzodiazepine use limited (29%, 20%)<br>Anticholinergics to treat EP symptoms (15%, 10%) | 78 | R2, D2, W1 | n/a                                                                                                                                                                             | n/a                                                                                                                                                           | no data                    | no data | Sympt relapse into affective episode (YMRS +/or HAM-D≥15) without symptoms initially<br>(1) 11/30<br>(2) 21/38<br>Median time to relapse (days)<br>(1) 163<br>(2) 42<br>Depression alone:<br>(1) 7/30 (163 days)<br>(2) 15/38 (55 days)<br>Mania alone:<br>(1) 6/30 (172 days)<br>(2) 11/38 (59 days) |
| Tohen et al. 2005 [47]                                             | Bipolar disorder with remission of manic/mixed episode after open-label treatment with olanzapine plus lithium for 6 weeks<br>Age: 42 (13) years<br>M: 47%<br>manic: 93%<br>psychotic: 26%<br>Excl: history of intolerance or lack of response to lithium or olanzapine | (1) olanzpine 5-20 mg/day, n=217<br>(2) lithium to give 0.6-1.4 mEq/L, n=214<br>Patients started on open-label doses of drugs, then 4 week d-b taper to monotherapy | (1) 12 mg/day<br>(2) 1103 mg/day                                   | Benzodiazepine use limited (36%, 52%)<br>Anticholinergics to treat EP symptoms (7%, 8%)   | 52 | R2, D2, W1 | n/a                                                                                                                                                                             | n/a                                                                                                                                                           | no data                    | no data | Sympt recurrence of any mood episode (YMRS +/or HAM-D≥15)<br>(1) 65/217<br>(2) 83/214<br>Mania:<br>(1) 30/217<br>(2) 50/214<br>Depression:<br>(1) 34/217<br>(2) 23/214<br>Time to recurrence not sig diff between groups                                                                              |

|                        |                                                                                                                                                                                                                                                                                                                                                                             |                                                          |               |                                                                                                 |    |            |     |     |     |         |                                                                                                                                                                                                                                                                                                                                                                                                 |
|------------------------|-----------------------------------------------------------------------------------------------------------------------------------------------------------------------------------------------------------------------------------------------------------------------------------------------------------------------------------------------------------------------------|----------------------------------------------------------|---------------|-------------------------------------------------------------------------------------------------|----|------------|-----|-----|-----|---------|-------------------------------------------------------------------------------------------------------------------------------------------------------------------------------------------------------------------------------------------------------------------------------------------------------------------------------------------------------------------------------------------------|
| Tohen et al. 2006 [48] | Bipolar I disorder with remission of manic/mixed episode after open-label treatment with olanzapine for 6-12 weeks<br>Age: 40 (12) years<br>M:39%<br>manic:67%<br>mixed:33%<br>psychotic:18%<br>Excl: intolerance to minimum dose of olanzapine in open-label phase                                                                                                         | (1) olanzapine 5-20 mg/day, n=225<br>(2) placebo, n=136  | 12.5 mg/day   | Benzodiazepine use limited (27%, 36%)<br>Anticholinergics to treat EP symptoms (4%, 4%)         | 48 | R1, D1, W1 | n/a | n/a | n/a | no data | Sympt recurrence of any mood episode (YMRS +/- HAM-D≥15)<br>(1) 105/225<br>(2) 109/136<br>Mania:<br>(1) 27/225<br>(2) 44/136<br>Depression:<br>(1) 68/225<br>(2) 53/136<br>Mixed:<br>(1) 10/225<br>(2) 12/136<br>Time to any relapse:<br>(1) 174 days<br>(2) 22 days<br><br>Olanzapine better for pts with/w/out rapid cycling and with/w/out psychotic features, and manic/mixed index episode |
| Keck et al. 2006 [49]  | Bipolar I disorder with recent stabilisation of manic/mixed episode after treatment with aripiprazole (YMRS<10, MADRS≤13 for ≥6 weeks)<br>Age: 40±1 years<br>M:33%<br>manic:70%<br>mixed:30%<br>Excl: history of cognitive disorder, schizophrenia/schizoaffective disorder, psychoactive or substance use disorder, unresponsive to clozapine, intolerance to aripiprazole | (1) aripiprazole 15-30 mg/day, n=78<br>(2) placebo, n=83 | mean 25mg/day | Lorazepam (39%, 46%)<br>Anticholinergics for EPS (39%, 31%)<br>Analgesic/antipyretic (34%, 36%) | 26 | R1, D1, W1 | n/a | n/a | n/a | no data | Relapse (withdrawal due to LoE)<br>(1) 19/77<br>(2) 36/83<br>Manic relapse:<br>(1) 6/77<br>(2) 19/83<br>Depressive relapse:<br>(1) 9/77<br>(2) 11/83<br>Mixed/unknown:<br>(1) 4/77<br>(2) 6/83<br><br>Time to relapse sig longer for (1) than (2)                                                                                                                                               |

QS = quality score; R = randomised; D = double blind; W = withdrawals or drop outs; CGI = clinical global impression; TE = treatment emergent; EP = extrapyramidal; EPRS = extrapyramidal rating scale; AIMS = abnormal involuntary movement scale; SAS = Simpson-Angus rating scale; BARS = Barnes akathisia rating scale

| Discontinuations                                                                |                          |                         |                | Adverse events         |         |         |         | Scale-defined adverse events                                                         |                 |
|---------------------------------------------------------------------------------|--------------------------|-------------------------|----------------|------------------------|---------|---------|---------|--------------------------------------------------------------------------------------|-----------------|
| All cause                                                                       | LoE                      | AE                      | T-E depression | All cause              | Severe  | Serious | T-R     | EPS                                                                                  | Weight gain ≥7% |
| no data                                                                         | no data                  | no data                 | no data        | no data                | no data | no data | no data | SAS<br>Mean score in lithium group lower than in risperidone or haloperidol groups   | no data         |
| (1) 27/70<br>(2) 45/69                                                          | (1) 20/70<br>(2) 33/69   | (1) 0/70<br>(2) 2/69    | no data        | no data                | no data | no data | no data | SAS, BARS, AIMS<br>Infrequent<br>No sig diff                                         | no data         |
| (1) 1/15<br>(2) 3/15                                                            | no data                  | (1) 1/15<br>(2) 1/15    | no data        | no data                | no data | no data | no data | SAS , BARS<br>No sig diff in SAS between groups<br>Akathisia<br>(1) 0/15<br>(2) 0/15 | no data         |
| (1) 21/55<br>(2) 35/60                                                          | (1) 15/55<br>(2) 23/60   | (1) 2/55<br>(2) 1/60    | no data        | no data                | no data | no data | no data | SAS, BARS<br>Infrequent<br>No sig diff                                               | no data         |
| (1) 39/125<br>(2) 45/126                                                        | (1) 11/125<br>(2) 12/126 | (1) 12/125<br>(2) 9/126 | no data        | no data                | no data | no data | no data | SAS, BARS, AIMS<br>No sig diff                                                       | no data         |
| (1) 59/134<br>(2) 73/125                                                        | (1) 19/134<br>(2) 45/125 | (1) 10/134<br>(2) 7/125 | no data        | no data                | no data | no data | no data | EPRS<br>Small but sig inc Risp vs Placebo overall but not indiv subscales            | no data         |
| (1) 12/75<br>(2) 14/75<br>Disc early and entered open<br>(1) 15/75<br>(2) 25/75 | (1) 2/75<br>(2) 1/75     | (1) 1/75<br>(2) 3/75    | no data        | (1) 43/75<br>(2) 38/75 | no data | no data | no data | EPRS<br>No sig diff in means                                                         | no data         |

|                                                                                             |                                                                |                                                       |         |                                     |                       |                        |                         |                                                                          |                        |
|---------------------------------------------------------------------------------------------|----------------------------------------------------------------|-------------------------------------------------------|---------|-------------------------------------|-----------------------|------------------------|-------------------------|--------------------------------------------------------------------------|------------------------|
| (1) 18/52<br>(2) 28/53<br>(3) 25/51                                                         | (1) 3/52<br>(2) 3/53<br>(3) 5/51                               | (1) 2/52<br>(2) 1/53<br>(3) 2/51                      | no data | (1) 42/52<br>(2) 49/53<br>(3) 43/51 | no data               | no data                | no data                 | EPRS<br>Significantly greater increase with<br>haloperidol than placebo. | no data                |
| (1) 34/90<br>(2) 51/100                                                                     | (1) 7/90<br>(2) 14/100                                         | (1) 5/90<br>(2) 6/100                                 | no data | no data                             | no data               | no data                | no data                 | SAS, BARS<br>Low levels<br>No sig diff                                   | (1) 4/90<br>(2) 1/100  |
| (1) 52/197<br>(2) 71/205                                                                    | (1) 22/197<br>(2) 30/205                                       | (1) 6/197<br>(2) 8/205                                | no data | no data                             | no data               | no data                | no data                 | SAS, BARS<br>Small changes<br>No sig diff                                | no data                |
| (1) 65/140<br>(2) 39/70                                                                     | (1) 27/140<br>(2) 25/70                                        | (1) 9/140<br>(2) 3/70                                 | no data | (1) 126/140<br>(2) 54/70            | no data               | no T-R                 | (1) 99/140<br>(2) 38/70 | SAS, BARS, AIMS<br>Infreq<br>No sig diff                                 | no data                |
| (1) 76/130<br>(2) 104/132<br>Entered<br>open-label<br>treatment<br>(1) 17/130<br>(2) 37/132 | (1) 13/130<br>(2) 16/132<br>but see open<br>label<br>treatment | (1) 14/130<br>(2) 13/132                              | no data | no data                             | no data               | (1) 4/130<br>(2) 4/132 | no data                 | SAS, BARS small but sig inc in (1)<br>AIMS no sig diff                   | (1) 2/127<br>(2) 0/127 |
| (1) 55/140<br>(2) 30/66                                                                     | (1) 18/140<br>(2) 19/66                                        | (1) 9/140<br>(2) 1/66<br>T-R<br>(1) 8/139<br>(2) 1/66 | no data | (1) 109/139<br>(2) 44/66            | (1) 4/139<br>(2) 1/66 | no data                | (1) 90/139<br>(2) 27/66 | SAS, BARS, AIMS<br>No sig diff                                           | (1) 6/125<br>(2) 2/59  |

|                          |                         |                        |         |         |                       |                        |         |                              |         |
|--------------------------|-------------------------|------------------------|---------|---------|-----------------------|------------------------|---------|------------------------------|---------|
| (1) 16/146<br>(2) 42/144 | (1) 7/146<br>(2) 21/144 | (1) 5/146<br>(2) 3/144 | no data | no data | most mild to moderate | similar in both groups | no data | ESRS<br>Small, insig changes | no data |
|--------------------------|-------------------------|------------------------|---------|---------|-----------------------|------------------------|---------|------------------------------|---------|

|                                        |                                     |                                     |         |         |                       |         |         |                                                                |         |
|----------------------------------------|-------------------------------------|-------------------------------------|---------|---------|-----------------------|---------|---------|----------------------------------------------------------------|---------|
| (1) 17/154<br>(2) 14/144<br>(3) 21/140 | (1) 5/154<br>(2) 2/144<br>(3) 9/140 | (1) 6/154<br>(2) 4/144<br>(3) 7/140 | no data | no data | most mild to moderate | no data | no data | ESRS<br>Sig diff from placebo for haloperidol, not risperidone | no data |
|----------------------------------------|-------------------------------------|-------------------------------------|---------|---------|-----------------------|---------|---------|----------------------------------------------------------------|---------|

|                          |                          |                          |         |         |                                                                                     |                          |         |                                                                                                                                                                                         |                        |
|--------------------------|--------------------------|--------------------------|---------|---------|-------------------------------------------------------------------------------------|--------------------------|---------|-----------------------------------------------------------------------------------------------------------------------------------------------------------------------------------------|------------------------|
| (1) 61/136<br>(2) 63/133 | (1) 12/136<br>(2) 28/133 | (1) 12/136<br>(2) 10/133 | no data | no data | Somnolence and gi events with aripiprazole generally mild to moderate and transient | (1) 12/136<br>(2) 10/133 | no data | SAS, AIMS Changes small and not sig diff between groups<br>BARS Changes small, with sig diff at endpoint, but no sig diff between number of patients with score $\geq 2$ (clinical sig) | (1) 1/136<br>(2) 5/133 |
|--------------------------|--------------------------|--------------------------|---------|---------|-------------------------------------------------------------------------------------|--------------------------|---------|-----------------------------------------------------------------------------------------------------------------------------------------------------------------------------------------|------------------------|

---

|                          |                         |                         |                        |         |         |         |         |                                |         |
|--------------------------|-------------------------|-------------------------|------------------------|---------|---------|---------|---------|--------------------------------|---------|
| (1) 69/229<br>(2) 33/115 | (1) 7/229<br>(2) 14/115 | (1) 25/229<br>(2) 2/115 | (1) 0/229<br>(2) 2/115 | no data | no data | no data | no data | SAS, BARS, AIMS<br>No sig diff | no data |
|--------------------------|-------------------------|-------------------------|------------------------|---------|---------|---------|---------|--------------------------------|---------|

|                        |                        |                      |         |                                          |         |                                                         |         |                          |         |
|------------------------|------------------------|----------------------|---------|------------------------------------------|---------|---------------------------------------------------------|---------|--------------------------|---------|
| (1) 38/57<br>(2) 45/63 | (1) 11/57<br>(2) 14/63 | (1) 5/57<br>(2) 7/63 | no data | sig less with olanzapine than divalproex | no data | (1) 2/57<br>(2) 5/63<br><br>T-R<br>(1) 1/57<br>(2) 1/63 | no data | SAS, BARS<br>No sig diff | no data |
|------------------------|------------------------|----------------------|---------|------------------------------------------|---------|---------------------------------------------------------|---------|--------------------------|---------|

|                                                                                                                                                              |                                       |                                                           |                                    |         |                       |                         |         |                                                                                                                                                                |                                     |
|--------------------------------------------------------------------------------------------------------------------------------------------------------------|---------------------------------------|-----------------------------------------------------------|------------------------------------|---------|-----------------------|-------------------------|---------|----------------------------------------------------------------------------------------------------------------------------------------------------------------|-------------------------------------|
| (1) 94/234<br>(2) 103/219                                                                                                                                    | (1) 35/234<br>(2) 33/219              | (1) 19/234<br>(2) 25/219                                  | no data                            | no data | no data               | no data                 | no data | SAS, AIMS, BARS<br>EPS sig worse with haloperidol<br>Parkinsonism (1) 24/187 (2) 92/169<br>Akathisia (1) 20/203 (2) 78/193<br>Dyskinesia (1) 7/223 (2) 19/208  | (1) 91/229<br>(2) 34/211            |
| (1) 35/107<br>(2) 62/97<br>(3) 31/98                                                                                                                         | (1) 16/107<br>(2) 38/97<br>(3) 12/98  | (1) 7/107<br>(2) 4/97<br>(3) 6/98                         | no data                            | no data | most mild to moderate | no data                 | no data | SAS, BARS<br>EPS rel events<br>(1) 14/107<br>(2) 9/97<br>(3) no data<br>Overall no sig diff between<br>quetiapine and placebo. More<br>tremor in lithium group | no data                             |
| (1) 47/102<br>(2) 59/101<br>(3) 45/99                                                                                                                        | (1) 27/102<br>(2) 43/101<br>(3) 25/99 | (1) 5/102<br>(2) 6/101<br>(3) 10/99                       | (1) 1/102<br>(2) 3/101<br>(3) 0/99 | no data | no data               | no data                 | no data | SAS, BARS<br>No sig diff bet (1) and (2), but (3)<br>sig worse                                                                                                 | (1) 13/102<br>(2) 4/101<br>(3) 5/99 |
| at 3 weeks<br>(1) 41/175<br>(2) 77/172<br>at 12 weeks<br>(1) 86/175<br>(2) 122/172<br><br>Time to disc<br>greater for<br>aripiprazole<br>than<br>haloperidol | (1) 30/175<br>(2) 10/172              | (1) 32/175<br>(2) 84/172<br>T-R<br>(1) 0/175<br>(2) 1/172 | no data                            | no data | no data               | (1) 6/175<br>(2) 12/172 | no data | SAS, BARS, AIMS show minimal<br>change for aripiprazole, sig<br>worsening for haloperidol                                                                      | no data                             |

|             |            |            |         |         |         |         |         |                 |            |
|-------------|------------|------------|---------|---------|---------|---------|---------|-----------------|------------|
| (1) 106/125 | (1) 24/125 | (1) 31/125 | no data | SAS, BARS, AIMS | (1) 29/123 |
| (2) 106/127 | (2) 28/126 | (2) 25/126 |         |         |         |         |         | No sig diff     | (2) 22/123 |

|                        |                        |                      |         |         |         |         |         |                                                                                                                                                   |                       |
|------------------------|------------------------|----------------------|---------|---------|---------|---------|---------|---------------------------------------------------------------------------------------------------------------------------------------------------|-----------------------|
| (1) 35/51<br>(2) 43/48 | (1) 13/51<br>(2) 17/48 | (1) 5/51<br>(2) 8/48 | no data | SAS, BARS<br>No sig diff<br>(Akathisia)<br>(1) 4/51<br>(2) 3/48<br>(Parkinsonism)<br>(1) 3/51<br>(2) 4/48<br>(Dyskinesia)<br>(1) 0/51<br>(2) 2/48 | (1) 14/51<br>(2) 3/48 |
|------------------------|------------------------|----------------------|---------|---------|---------|---------|---------|---------------------------------------------------------------------------------------------------------------------------------------------------|-----------------------|

|                            |                          |                          |         |         |         |         |         |                                                                                                                                                                                                    |                          |
|----------------------------|--------------------------|--------------------------|---------|---------|---------|---------|---------|----------------------------------------------------------------------------------------------------------------------------------------------------------------------------------------------------|--------------------------|
| (1) 116/217<br>(2) 144/214 | (1) 31/217<br>(2) 34/214 | (1) 41/217<br>(2) 55/214 | no data | SAS, BARS, AIMS<br>Changes small and not sig diff<br>between groups<br>(Akathisia)<br>(1) 0/189<br>(2) 4/197<br>(Parkinsonism)<br>(1) 6/177<br>(2) 5/176<br>(Dyskinesia)<br>(1) 3/206<br>(2) 2/209 | (1) 64/217<br>(2) 21/214 |
|----------------------------|--------------------------|--------------------------|---------|---------|---------|---------|---------|----------------------------------------------------------------------------------------------------------------------------------------------------------------------------------------------------|--------------------------|

|                        |                        |                      |                     |                        |         |                       |         |                                                                                                                                                                                                                                                                                                                                 |                      |
|------------------------|------------------------|----------------------|---------------------|------------------------|---------|-----------------------|---------|---------------------------------------------------------------------------------------------------------------------------------------------------------------------------------------------------------------------------------------------------------------------------------------------------------------------------------|----------------------|
| (1) 39/78<br>(2) 55/83 | (1) 19/78<br>(2) 36/83 | (1) 5/78<br>(2) 1/83 | (1) <3%<br>(2) 6/83 | (1) 57/77<br>(2) 58/83 | no data | (1) 6/77<br>(2) 11/83 | no data | SAS, AIMS, BARS changes<br>minimal<br>SAS≥15 (moderate severity):<br>(1) 7/76<br>(2) 6/81<br>BARS≥3 (moderate to severe):<br>(1) 4/76<br>(2) 2/81<br><br>EPS more frequent with<br>aripiprazole than placebo<br>(Akathisia)<br>(1) 5/77<br>(2) 1/83<br>(Tremor)<br>(1) 7/77<br>(2) 1/83<br>(Hypertonia)<br>(1) 3/77<br>(2) 1/83 | (1) 7/56<br>(2) 0/60 |
|------------------------|------------------------|----------------------|---------------------|------------------------|---------|-----------------------|---------|---------------------------------------------------------------------------------------------------------------------------------------------------------------------------------------------------------------------------------------------------------------------------------------------------------------------------------|----------------------|
