# Supplementary material for: Atypical antipsychotics in bipolar disorder: systematic review of randomised trials
Source: BMC Psychiatry. 2007 Aug 16;7:40. doi: 10.1186/1471-244X-7-40 (PMC2020469; doi:10.1186/1471-244X-7-40)
Supplement: Additional file 4 — Excluded papers. Papers excluded, with reason for exclusion. [file 1471-244X-7-40-S4.pdf]

Additional file 4: Excluded studies

| Author                  | Publication                                                                                                                                                                                                                                                    | Reason for exclusion                                   |
|-------------------------|----------------------------------------------------------------------------------------------------------------------------------------------------------------------------------------------------------------------------------------------------------------|--------------------------------------------------------|
| Baker RW, et al.        | The impact of response to previous mood stabilizer therapy on response to olanzapine versus placebo for acute mania. <i>Bipolar Disord</i> 2002;4:43-9.                                                                                                        | Subgroup analysis of Tohen 2000                        |
| Namjoshi MA, et al.     | Economic, clinical, and quality-of-life outcomes associated with olanzapine treatment in mania. Results from a randomized controlled trial. <i>J Affect Disord</i> 2002;69:109-18.                                                                             | Same patients as Tohen 1999, with open-label extension |
| Shi L, et al.           | Olanzapine versus haloperidol in the treatment of acute mania: clinical outcomes, health-related quality of life and work status. <i>Int Clin Psychopharmacol</i> 2002;17:227-37.                                                                              | Same patients as Tohen 2003                            |
| Baker RW, et al.        | Placebo-controlled trials do not find association of olanzapine with exacerbation of bipolar mania. <i>J Affect Disord</i> 2003;73:147-53.                                                                                                                     | Pooled secondary analysis                              |
| Baker RW, et al.        | Acute dysphoric mania: treatment response to olanzapine versus placebo. <i>J Clin Psychopharmacol</i> 2003;23:132-7.                                                                                                                                           | Pooled secondary analysis                              |
| Baldessarini RJ, et al. | Olanzapine versus placebo in acute mania: treatment responses in subgroups. <i>J Clin Psychopharmacol</i> 2003;23:370-6.                                                                                                                                       | Pooled secondary analysis                              |
| Chengappa KN, et al.    | Rates of response, euthymia and remission in two placebo-controlled olanzapine trials for bipolar mania. <i>Bipolar Disord</i> 2003;5:1-5.                                                                                                                     | Pooled secondary analysis                              |
| Hirschfeld RM, et al.   | The safety and early efficacy of oral-loaded divalproex versus standard titration divalproex, lithium, olanzapine, and placebo in the treatment of acute mania associated with bipolar disorder. <i>J Clin Psychiatry</i> 2003;64:841-6.                       | Pooled secondary analysis                              |
| Sanger TM, et al.       | Olanzapine in the acute treatment of bipolar I disorder with a history of rapid cycling. <i>J Affect Disord</i> 2003;73:155-61.                                                                                                                                | Subgroup analysis                                      |
| Yatham LN, et al.       | Risperidone in acute and continuation treatment of mania. <i>Int Clin Psychopharmacol</i> 2003;18:227-35.                                                                                                                                                      | Patients incl in Yatham 2003                           |
| Baker RW, et al.        | Efficacy of olanzapine combined with valproate or lithium in the treatment of dysphoric mania. <i>Br J Psychiatry</i> 2004;185:472-8.                                                                                                                          | Subgroup analysis                                      |
| Namjoshi MA, et al.     | Quality of life assessment in patients with bipolar disorder treated with olanzapine added to lithium or valproic acid. <i>J Affect Disord</i> 2004;81:223-9.                                                                                                  | Same patients as Tohen 2003, not ITT                   |
| Shi L, et al.           | Effects of olanzapine alone and olanzapine/fluoxetine combination on health-related quality of life in patients with bipolar depression: secondary analyses of a double-blind, placebo-controlled, randomized clinical trial. <i>Clin Ther</i> 2004;26:125-34. | Same patients as Tohen 2003                            |
| Vieta E, et al.         | Comparison of rapid-cycling and non-rapid-cycling bipolar I manic patients during treatment with olanzapine: analysis of pooled data. <i>J Clin Psychiatry</i> 2004;65:1420-8.                                                                                 | Pooled secondary analysis                              |
| Amsterdam JD, et al.    | Comparison of fluoxetine, olanzapine, and combined fluoxetine plus olanzapine initial therapy of bipolar type I and type II major depression--lack of manic induction. <i>J Affect Disord</i> 2005;87:121-30.                                                  | Fewer than 10 patients pre treatment group             |
| Keck PE, et al.         | Analyses of treatment-emergent mania with olanzapine/fluoxetine combination in the treatment of bipolar depression. <i>J Clin Psychiatry</i> 2005;66:611-6.                                                                                                    | Same patients as Tohen 2003 (depression)               |
| Strakowski SM, et al.   | Quality of life during treatment with haloperidol or olanzapine in the year following a first psychotic episode. <i>Schizophr Res</i> 2005;78:161-9.                                                                                                           | Patients with schizophrenia                            |
| Vieta E, et al.         | Quetiapine monotherapy for mania associated with bipolar disorder: combined analysis of two international, double-blind, randomised, placebo-controlled studies. <i>Curr Med Res Opin</i> 2005;21:923-34.                                                      | Pooled secondary analysis                              |
| Gopal S, et al.         | Symptomatic remission in patients with bipolar mania: results from a double-blind, placebo-controlled trial of risperidone monotherapy. <i>J Clin Psychiatry</i> 2005;66:1016-20.                                                                              | Secondary analysis of Khanna, 2005                     |
| Nierenberg AA, et al.   | Treatment-Resistant Bipolar Depression: A STEP-BD Equipoise Randomized Effectiveness Trial of Antidepressant Augmentation With Lamotrigine, Inositol, or Risperidone. <i>Am J Psychiatry</i> 2006;163:210-6.                                                   | Open-label treatment                                   |
